# Supplementary material for: Regulation of cellulase production via calcium signaling in Trichoderma reesei under PEG8000 stress
Source: Springer Nature journal article supplement (doi:10.1007/s00253-023-12901-w), 2024-01-26
Supplement: MOESM1 [file 253_2023_12901_MOESM1_ESM.pdf]

## **SUPPLEMENTARY MATERIALS**

**for**

### **Applied Microbiology and Biotechnology**

#### **Regulation of cellulase production via calcium signaling in *Trichoderma reesei* under PEG8000 stress**

Shuai Liu <sup>a,1</sup>, Lin Quan <sup>a,1</sup>, Mei Yang <sup>a</sup>, Dan Wang <sup>b</sup>, Yong-Zhong Wang <sup>a,\*</sup>

<sup>a</sup> Key Laboratory of Biorheological Science and Technology (Chongqing University),  
Ministry of Education, College of Bioengineering, Chongqing University, Chongqing  
400030, China

<sup>b</sup> School of Chemistry and Chemical Engineering, Chongqing University, Chongqing  
400044, China

\* Corresponding author: Yong-Zhong Wang, E-mail: [wangyzh@cqu.edu.cn](mailto:wangyzh@cqu.edu.cn) (Y-Z.  
Wang)

<sup>1</sup> Shuai Liu and Lin Quan contributed equally to this work.

## Supplementary Figures

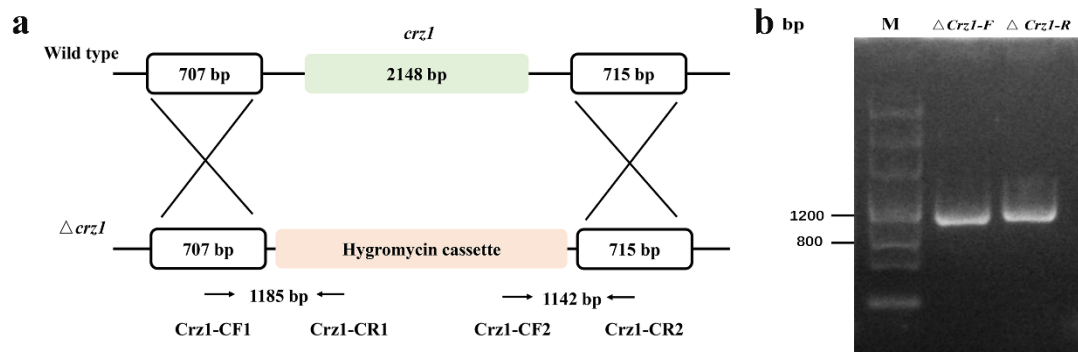

**Fig. S1.** Construction and verification of the  $\Delta crzI$  mutant. **a** Schematic representation of the *crzI* locus from *T. reesei* CICC2626 and the  $\Delta crzI$  mutant. The binding sites of primers on the genome of *T. reesei* CICC2626 and  $\Delta crzI$ , and the expected sizes of the products in PCR verification are given. The region from +1 to +2148 bp relative to the translation start site of *crzI* (light green blue box) was replaced with hygromycin resistance expression cassette (Hygromycin, pink box). **b** PCR verification of the  $\Delta crzI$  mutant. Lane M, DNA molecular mass marker. PCR amplification results of  $\Delta CrzI$ -F were obtained using Crz1-CF1 with Crz1-CR1 and  $\Delta CrzI$ -R were obtained using Crz1-CF2 with Crz1-CR2 (Table S1).

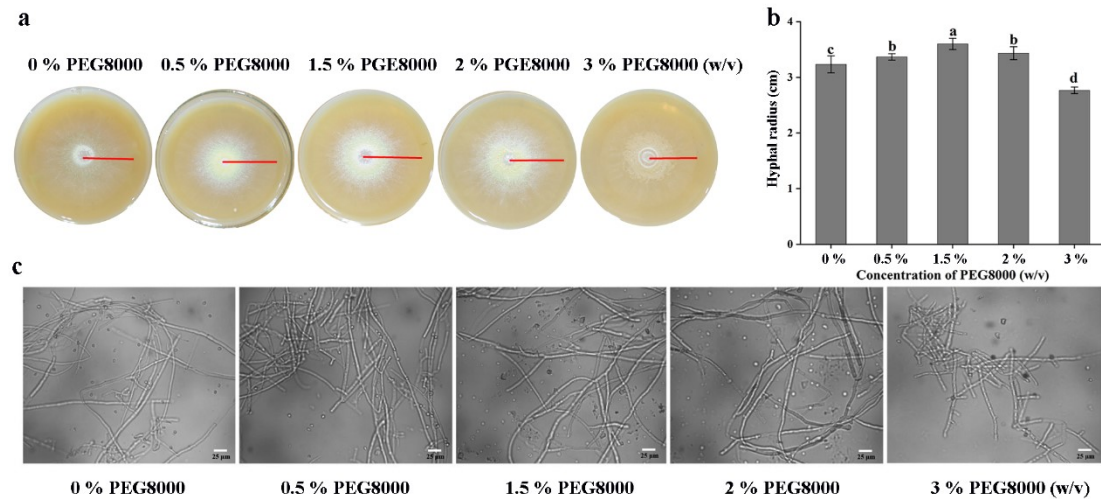

**Fig. S2.** Hyphal growth and morphology of *T. reesei* CICC2626. PEG8000 was added at final concentrations of 0 % (control), 0.5 %, 1.5 %, 2 % or 3 % (w/v). The corresponding osmotic pressure was 203, 206, 229, 236, and 268 mOsm/kg. **a** Hyphal growth of *T. reesei* CICC2626 on YPD plates. **b** Colony radius of *T. reesei* CICC2626 on YPD plates. The red line represents mycelium morphologies throughout the 4<sup>th</sup> day of culture. **c** Hyphal morphology of *T. reesei* CICC2626 was imaged using an inverted fluorescent microscope (Leica, Wetzlar, Germany) after 4 days of culture. Different letters in b. indicate significant differences between the columns ( $p < 0.05$ , Duncan's multiple-range test).

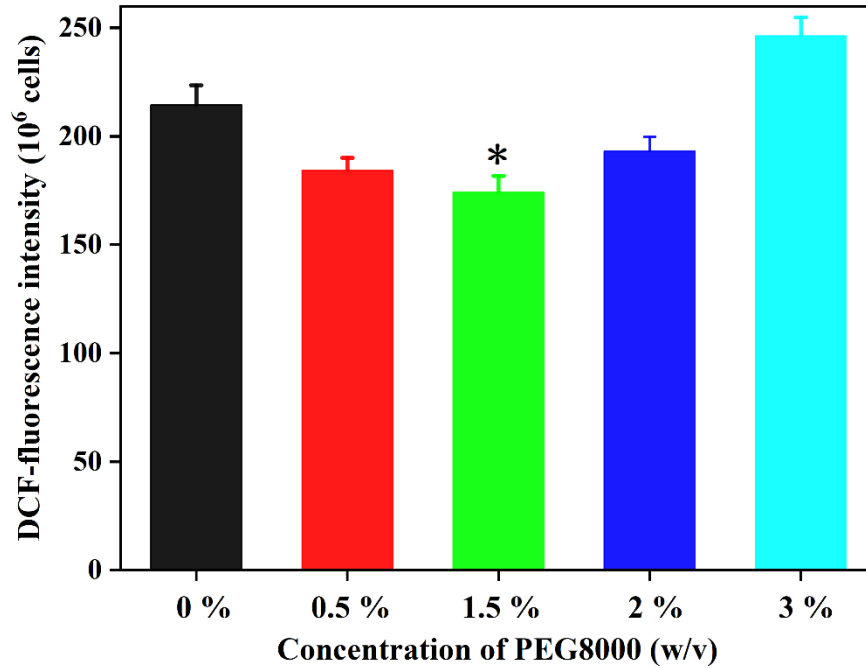

**Fig. S3.** Effects of different concentrations of PEG8000 at the final concentrations of 0, 0.5, 1.5, 2, and 3 % (w/v) on ROS concentration of *T. reesei* CICC2626. The seed solution of *T. reesei* CICC2626 was cultured in YPD medium for 24 h; then transferred to fresh MM medium containing 2 % (w/v) Avicel with 0 to 3 % PEG8000, and then cultivated for further 4 d. Values are the mean  $\pm$  SD of the results from three independent experiments. Asterisks indicate significant differences (\* $p < 0.05$ , \*\* $p < 0.01$ , Student's  $t$  test).

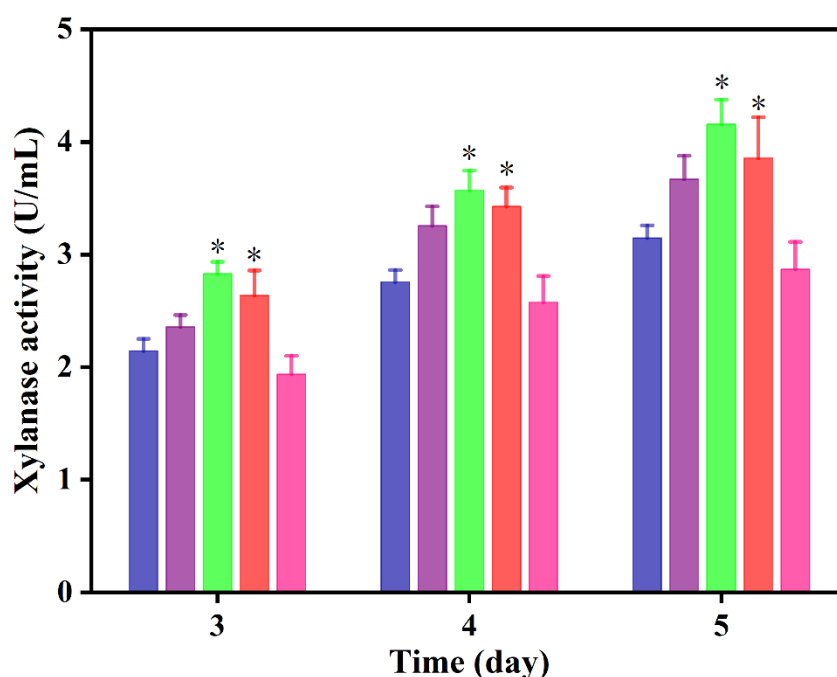

**Fig. S4.** Effects of different concentrations of PEG8000 at the final concentrations of 0, 0.5, 1.5, 2, and 3 % (w/v) on xylanase activity of *T. reesei* CICC2626. The seed solution of *T. reesei* CICC2626 was cultured in YPD medium for 24 h; then transferred to fresh MM medium containing 2 % (w/v) Avicel with 0 to 3 % PEG8000, and then cultivated for further 36 to 120 h. Blue bar, addition of 0 % (w/v) PEG8000; purple bar, addition of 0.5 % (w/v) PEG8000; green bar, addition of 1.5 % (w/v) PEG8000; red bar, addition of 2 % (w/v) PEG8000; pink bar, addition of 3 % (w/v) PEG8000. Values are the mean  $\pm$  SD of the results from three independent experiments. Asterisks indicate significant differences (\* $p$  < 0.05, \*\* $p$  < 0.01, Student's  $t$  test).

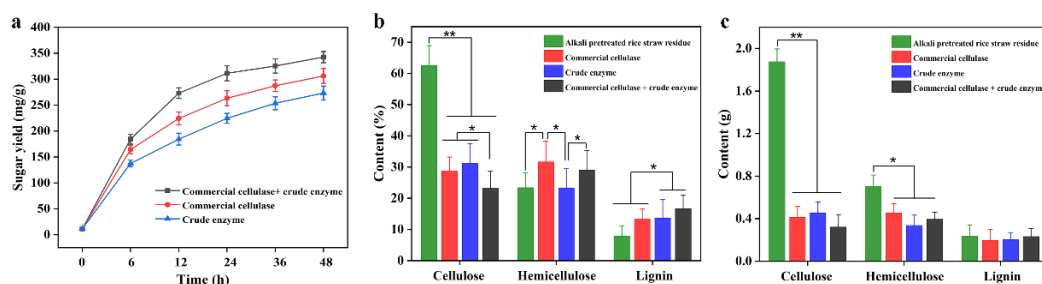

**Fig. S5.** Synergistic hydrolysis of pretreated rice straw by crude enzyme and commercial cellulase from 0 % PEG8000 supplement culture. a The concentration of reducing sugar after hydrolysis. b-c The percentage and weight of cellulose, hemicellulose and lignin in alkali-pretreated rice straw residues after hydrolysis. The hydrolysis reaction was carried out with 15 % (w/v) alkali-pretreated rice straw in a 20 mL system. After the hydrolysis reaction, the treated residue yield of groups commercial cellulase, crude enzyme and commercial cellulase + crude enzyme from rice straw was 1.42, 1.46 and 1.38 g respectively. Values are the mean  $\pm$  SD of the results from three independent experiments. Asterisks indicate significant differences (\* $p < 0.05$ , Student's *t* test).

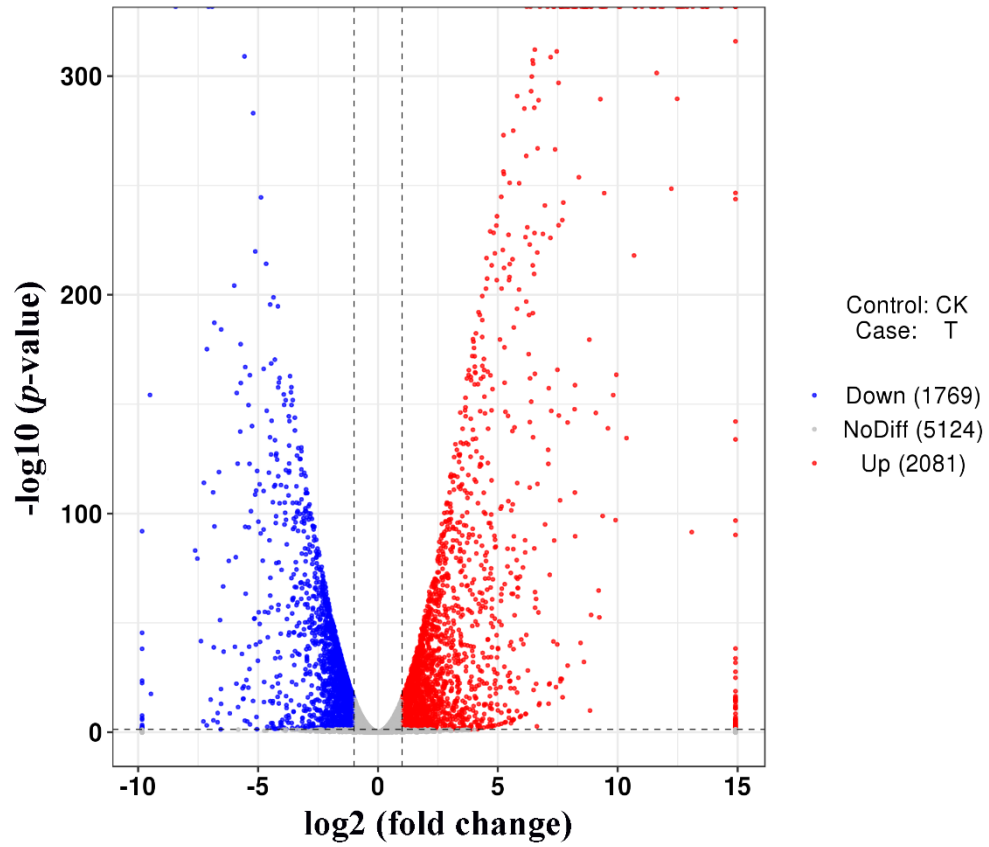

**Fig. S6.** Volcano plot analysis of up- and down-regulated genes of strains treated with 0 or 1.5 % (w/v) PEG8000. CK, control group; T, PEG8000 group. Red dots indicate significantly up-regulated genes; green dots indicate significantly down-regulated genes; gray dots indicate non-significantly different gene expression.

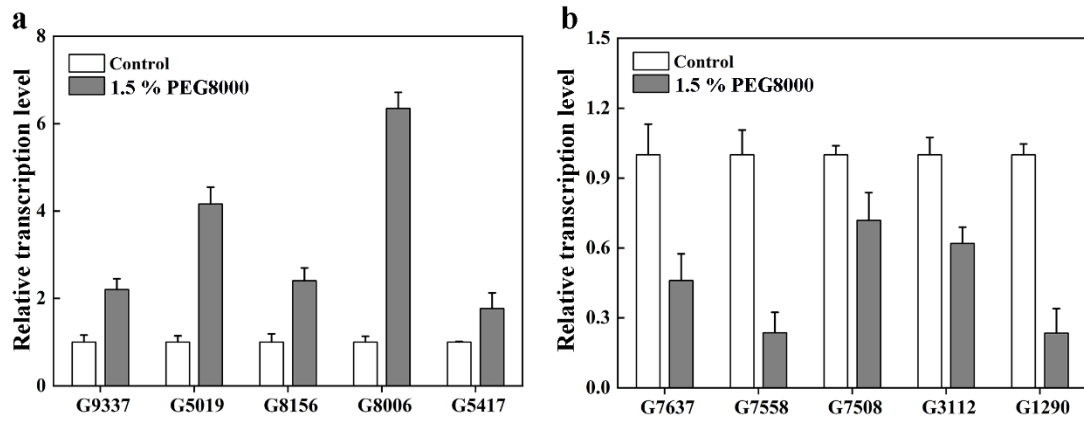

**Fig. S7.** RT-qPCR validation of ten differentially expressed genes (DEGs) at the mRNA level. Expression of five representative up-regulated genes (**a**) and five representative down-regulated genes (**b**) was determined to confirm the transcriptome data. CK, control group; T, PEG8000 group. The  $2^{-\Delta\Delta CT}$  values were calculated from quadruplicate runs of two independent experiments.



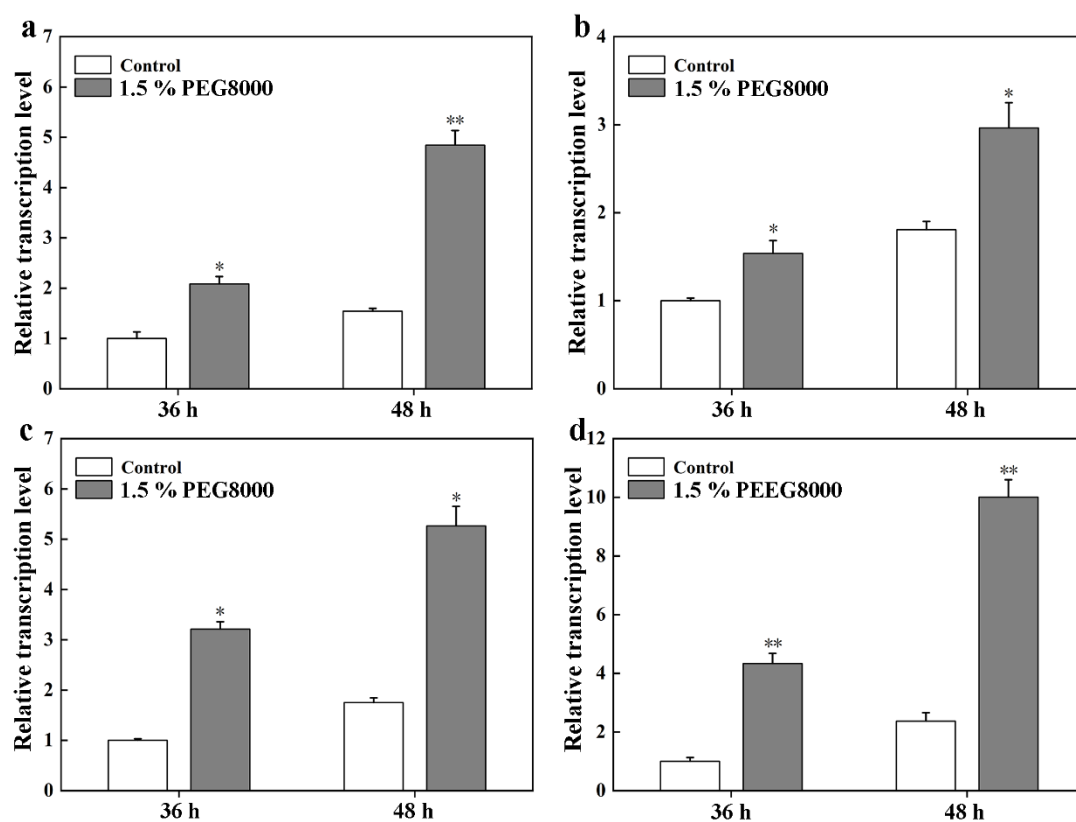

**Fig. S8.** The effect of PEG8000-induced osmotic stress on the expression levels of  $\text{Ca}^{2+}$  signaling-related genes *plc-e* (a), *cam* (b), *can* (c) and *crz1* (d) in *T. reesei* CICC2626. Values are the mean  $\pm$  SD of the results from three independent experiments. Asterisks indicate significant differences from untreated strains (\* $p < 0.05$ , \*\* $p < 0.01$ , Student's  $t$  test).

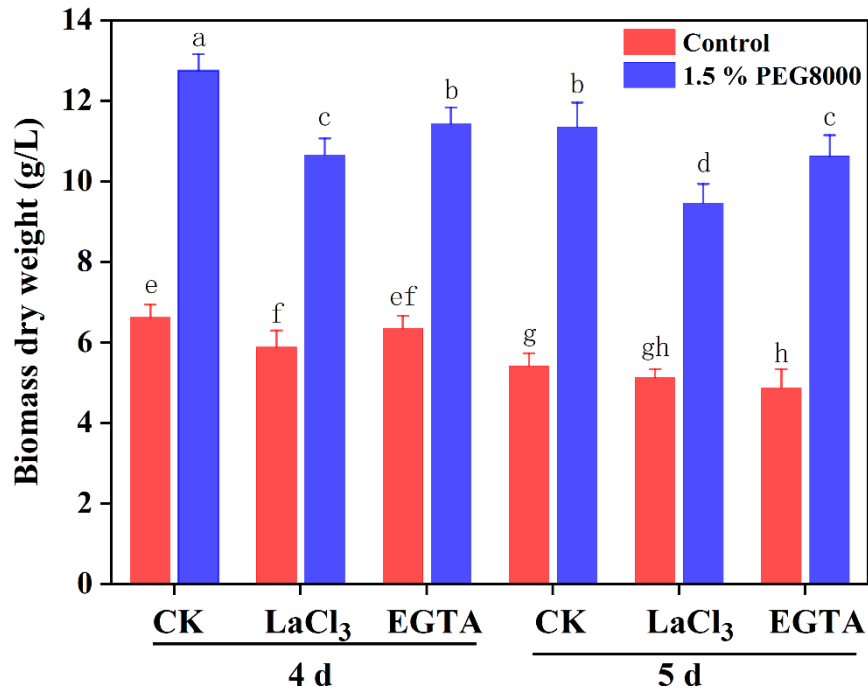

**Fig. S9.** Effects of  $\text{Ca}^{2+}$  inhibitors on the biomass of *T. reesei* CICC2626. *T. reesei*

CICC2626 was cultured in YPD medium for 24 h, transferred to fresh MM containing 2 % (w/v) Avicel with 0 or 1.5 % (w/v) PEG8000 and 0 or 10 mM  $\text{LaCl}_3$ /EGTA, and cultivated further for 4 to 5 d. Values are mean  $\pm$  standard deviation ( $n = 3$ ). Different letters indicate significant differences between the columns ( $p < 0.05$ , Duncan's multiple-range test).

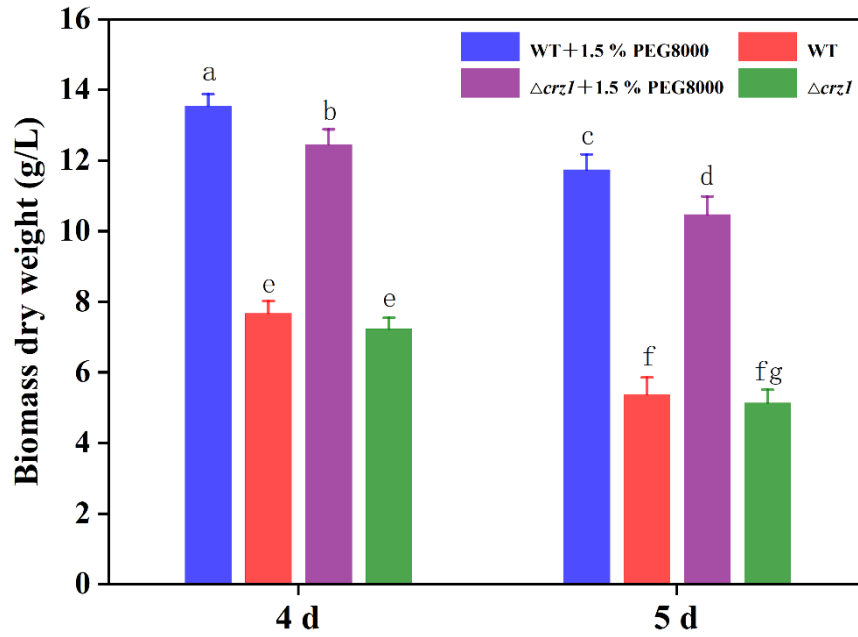

**Fig. S10.** Effect of *crzI* on the biomass of wild type and  $\Delta crzI$  strains. Wild type and  $\Delta crzI$  strains were cultured in YPD medium for 24 h, transferred to fresh MM containing 2 % (w/v) Avicel with 0 % or 1.5 % (w/v) PEG8000, and cultivated further for 4 to 5 d. Values are mean  $\pm$  standard deviation ( $n = 3$ ). Different letters indicate significant differences between the columns ( $p < 0.05$ , Duncan's multiple-range test).
